# Supplementary material for: The Association Between Child Maltreatment and Loneliness Across the Lifespan: A Systematic Review and Multilevel Meta-Analysis
Source: PubMed Central journal article supplement (PMC11539460; doi:10.1177/10775595221103420), 2022-06-02
Supplement: sj-pdf-2-cmx-10.1177_10775595221103420.pdf [file sj-pdf-2-cmx-10.1177_10775595221103420.pdf]

## Appendix A. Database Search Strings

### PsycINFO / ERIC / MEDLINE

((lonel\* or "perceived social isolation") and (maltreat\* or mistreat\* or abus\* or neglect\* or abandoned or incest\* or rape\* or "shaken baby syndrome") and (child\* or kid\* or teen\* or adolescen\* or youth)).mp.

### Cochrane Library

Searched in 'title abstract keyword' ((lonel\* or "perceived social isolation") and (maltreat\* or mistreat\* or abus\* or neglect\* or abandoned or incest\* or rape\* or "shaken baby syndrome") and (child\* or kid\* or teen\* or adolescen\* or youth)).

### EMBASE

(lonel\*:ti,ab,kw,lnk OR 'perceived social isolation':ti,ab,kw,lnk) AND (maltreat\*:ti,ab,kw,lnk OR mistreat\*:ti,ab,kw,lnk OR abus\*:ti,ab,kw,lnk OR neglect\*:ti,ab,kw,lnk OR abandoned:ti,ab,kw,lnk OR incest\*:ti,ab,kw,lnk OR rape\*:ti,ab,kw,lnk OR 'shaken baby syndrome':ti,ab,kw,lnk) AND (child\*:ti,ab,kw,lnk OR kid\*:ti,ab,kw,lnk OR teen\*:ti,ab,kw,lnk OR adolescen\*:ti,ab,kw,lnk OR youth:ti,ab,kw,lnk).

### PubMed

((lonel\* [TIAB] or "perceived social isolation" [TIAB]) and (maltreat\* [TIAB] or mistreat\* [TIAB] or abus\* [TIAB] or neglect\* [TIAB] or abandoned [TIAB] or incest\* [TIAB] or rape\* [TIAB] or "shaken baby syndrome" [TIAB]) and (child\* [TIAB] or kid [TIAB] or teen\* [TIAB] or adolescen\* [TIAB] or youth [TIAB])) OR ((lonel\* [SH] or "perceived social isolation" [SH]) and (maltreat\* [SH] or mistreat\* [SH] or abus\* [SH] or neglect\* [SH] or abandoned [SH] or incest\* [SH] or rape\* [SH] or "shaken baby syndrome" [SH]) and (child\* [SH] or kid [SH] or teen\* [SH] or adolescen\* [SH] or youth [SH])).

### Web of Science

TS = ((lonel\* or "perceived social isolation") and (maltreat\* or mistreat\* or abus\* or neglect\* or abandoned or incest\* or rape\* or "shaken baby syndrome") and (child\* or kid\* or teen\* or adolescen\* or youth)).

**Appendix B. Concise Version of the Coding Manual****Child Maltreatment Characteristics**

Type of child maltreatment

- 1 = Emotional abuse
- 2 = Physical abuse
- 3 = Sexual abuse
- 4 = Emotional neglect
- 5 = Physical neglect
- 6 = Multitype maltreatment (i.e., multiple types of child maltreatment were combined)

Perpetrator

- 1 = Parent
- 2 = Family member except parents
- 3 = Other
- 4 = Multiple perpetrators

Age of onset

Note all available information

Severity

Note all available information

Frequency

Note all available information

Chronicity

Note all available information

**Loneliness Characteristics**

Type of loneliness

- 1 = Emotional loneliness
- 2 = Social loneliness
- 3 = General loneliness (i.e., emotional and social loneliness have been combined into one score)

|                                          |                      |
|------------------------------------------|----------------------|
| Relationship-specific type of loneliness | 1 = Peers            |
|                                          | 2 = Family           |
|                                          | 3 = Romantic partner |

### Study Characteristics

|                                   |                                                                                                                                                                                                                      |
|-----------------------------------|----------------------------------------------------------------------------------------------------------------------------------------------------------------------------------------------------------------------|
| Measure child maltreatment        | 1 = Retrospective (i.e., participants indicated maltreatment in their past)                                                                                                                                          |
|                                   | 2 = Prospective (i.e., the child maltreatment was recorded at the time the maltreatment occurred, e.g., via Child Protective Services records or participants indicated that they currently experience maltreatment) |
| Reporter loneliness               | 1 = Self-report                                                                                                                                                                                                      |
|                                   | 2 = Parental report                                                                                                                                                                                                  |
|                                   | 3 = Teacher report                                                                                                                                                                                                   |
|                                   | 4 = Observer                                                                                                                                                                                                         |
|                                   | 5 = Peer(s)                                                                                                                                                                                                          |
| Reporter child maltreatment       | 1 = Self-report                                                                                                                                                                                                      |
|                                   | 2 = Parental report                                                                                                                                                                                                  |
|                                   | 3 = Records (e.g., Child Protective Services, court)                                                                                                                                                                 |
| Study design                      | 1 = Cross-sectional                                                                                                                                                                                                  |
|                                   | 2 = Experimental                                                                                                                                                                                                     |
|                                   | 3 = Longitudinal                                                                                                                                                                                                     |
|                                   | Also studies that used data on maltreatment that is collected in the past (e.g., Child Protective Services records) and measured loneliness at the time of the study will be considered as longitudinal.             |
| Reliability measure of loneliness | Cronbach's alpha                                                                                                                                                                                                     |

Reliability measure of child maltreatment      Cronbach's alpha

Country

Year of publication

**Sample Characteristics**

Sample size      Number of participants

Gender      Percentages of females

Age      Mean  
Standard deviation

Socioeconomic status (SES)      1 = 75% or more of the participants had low SES  
2 = 75% or more of the participants had middle/high SES  
3 = Mixed, none of the SES categories included more than 75% of the participants

Ethnic background      1 = 75% or more the participants had an ethnic minority background  
2 = 75% or more of the participants had an ethnic majority background  
3 = Mixed, neither participants with an ethnic majority nor ethnic minority background made up more than 75% of the sample

Clinical status      1 = Nonclinical

2 = Clinical

3 = Mixed, both clinical and nonclinical samples were included

**Appendix C. Study and Sample Characteristics for each Included Study**

| Article                          | Country | <i>N</i>  | Proportion female | Age mean | Age range | SES | Ethnic background | Clinical status | Study design | CM measure | CM reporter   | CM type    | CM alpha | LO type | LO alpha | <i>g</i> | <i>SE</i> |
|----------------------------------|---------|-----------|-------------------|----------|-----------|-----|-------------------|-----------------|--------------|------------|---------------|------------|----------|---------|----------|----------|-----------|
| Aakvaag et al. (2018)            | NO      | 1,011     | .60               | 21.00    | 17-35     | NA  | NA                | NC              | L            | R          | S             | SA         | NA       | S       | .85      | 0.64     | 0.08      |
|                                  |         |           |                   |          |           |     |                   |                 |              |            |               | PA         | NA       | S       | .85      | 0.85     | 0.16      |
|                                  |         |           |                   |          |           |     |                   |                 |              |            |               | EA         | NA       | S       | .85      | 0.64     | 0.09      |
|                                  |         |           |                   |          |           |     |                   |                 |              |            |               | EN         | NA       | S       | .85      | 0.77     | 0.11      |
| Appleyard et al. (2010)          | US      | 1,354     | .51               | 6.00     | NA        | NA  | NC                | L               | P            | R          | EA, PA, SA, N | NA         | S        | NA      | 0.24     | 0.06     |           |
| Babad et al. (2020)              | US      | 436       | .64               | 19.73    | 18-25     | M   | M                 | NC              | C            | R          | S             | EA         | NA       | NA      | .85      | 0.59     | 0.11      |
|                                  |         |           |                   |          |           |     |                   |                 |              |            |               | PA         | NA       | NA      | .85      | 0.25     | 0.16      |
|                                  |         |           |                   |          |           |     |                   |                 |              |            |               | SA         | NA       | NA      | .85      | 0.27     | 0.14      |
|                                  |         |           |                   |          |           |     |                   |                 |              |            |               | EN         | NA       | NA      | .85      | 0.84     | 0.14      |
|                                  |         |           |                   |          |           |     |                   |                 |              |            |               | PN         | NA       | NA      | .85      | 0.52     | 0.16      |
| Bell & Belicki (1998)            | CA      | 109       | .71               | 45.00    | 14-78     | M   | NA                | NC              | C            | R          | S             | EA, PA, SA | NA       | G       | NA       | 0.54     | 0.21      |
| Blanchard-Dallaire et al. (2014) | CA      | 168       | .70               | 9.79     | 8-12      | M   | NA                | NC              | L            | P          | R             | SA         | NA       | S       | .89      | 0.20     | 0.15      |
| Boyda et al. (2015)              | UK      | 7,403     | .57               | 51.00    | 16+       | MH  | MA                | NC              | C            | R          | S             | SA         | NA       | S       | NA       | 0.18     | 0.15      |
| Brown et al. (2016)              | US      | 339       | .49               | 19.00    | 18-25     | NA  | M                 | NC              | C            | R          | S             | PA         | .81      | G       | .96      | 0.52     | 0.12      |
|                                  |         |           |                   |          |           |     |                   |                 |              |            |               | PN         | .59      | G       | .96      | 0.26     | 0.11      |
|                                  |         |           |                   |          |           |     |                   |                 |              |            |               | SA         | .94      | G       | .96      | 0.26     | 0.11      |
|                                  |         |           |                   |          |           |     |                   |                 |              |            |               | EA         | .86      | G       | .96      | 0.60     | 0.12      |
|                                  |         |           |                   |          |           |     |                   |                 |              |            |               | EN         | .85      | G       | .96      | 0.58     | 0.12      |
| Chen & Qin (2020)                | CN      | 569       | .49               | 11.68    | 10-15     | M   | NA                | NC              | C            | R          | S             | EA         | .75      | S       | .82      | 0.61     | 0.09      |
| Fontes et al. (2017)             | BR      | 2,575,269 | .52               | NA       | NA        | NA  | NA                | NC              | C            | R          | S             | SA         | NA       | G       | NA       | 0.59     | 0.00      |
| Garnefski & Arends (1998)        | NL      | 1,490     | .80               | 15.00    | 12-19     | M   | NA                | M               | C            | R          | S             | SA         | NA       | G       | .60      | 0.52     | 0.05      |

| Article                            | Country | <i>N</i> | Proportion<br>female | Age<br>mean | Age<br>range | SES | Ethnic<br>background | Clinical<br>status | Study<br>design | CM<br>measure | CM<br>reporter | CM<br>type       | CM<br>alpha | LO<br>type | LO<br>alpha | <i>g</i> | <i>SE</i> |
|------------------------------------|---------|----------|----------------------|-------------|--------------|-----|----------------------|--------------------|-----------------|---------------|----------------|------------------|-------------|------------|-------------|----------|-----------|
| Giano & Hubach<br>(2019)           | US      | 156      | .00                  | 35.38       | 18+          | M   | MA                   | NC                 | C               | R             | S              | EA               | NA          | G          | .94         | 0.54     | 0.16      |
|                                    |         |          |                      |             |              |     |                      |                    |                 |               |                | PA               | NA          | G          | .94         | 0.22     | 0.18      |
|                                    |         |          |                      |             |              |     |                      |                    |                 |               |                | SA               | NA          | G          | .94         | 0.05     | 0.18      |
| Gibson & Hartshorne<br>(1996)      | US      | 257      | 1.00                 | NA          | NA           | MH  | MA                   | NC                 | C               | R             | S              | SA               | NA          | G          | .94         | 0.90     | 0.16      |
| Grayston et al.<br>(1992)          | CA      | 70       | 1.00                 | NA          | 7-12         | L   | NA                   | NC                 | L               | P             | R              | SA               | NA          | S          | NA          | 0.11     | 0.24      |
| Hamdan-Mansour &<br>Marmash (2007) | JO      | 645      | .49                  | NA          | NA           | NA  | NA                   | NC                 | C               | R             | S              | SA               | NA          | NA         | NA          | -0.09    | 0.22      |
|                                    |         |          |                      |             |              |     |                      |                    |                 |               |                | SA               | NA          | NA         | NA          | -0.01    | 0.25      |
|                                    |         |          |                      |             |              |     |                      |                    |                 |               |                | SA               | NA          | NA         | NA          | -0.11    | 0.23      |
| Hanlon et al. (2020)               | UK      | 179,801  | .58                  | 56.80       | AN           | M   | NA                   | NC                 | C               | R             | S              | PA               | NA          | G          | NA          | 0.25     | 0.03      |
|                                    |         |          |                      |             |              |     |                      |                    |                 |               |                | EA               | NA          | G          | NA          | 0.38     | 0.03      |
|                                    |         |          |                      |             |              |     |                      |                    |                 |               |                | SA               | NA          | G          | NA          | 0.18     | 0.04      |
|                                    |         |          |                      |             |              |     |                      |                    |                 |               |                | N                | NA          | G          | NA          | 0.35     | 0.04      |
| Hart et al. (2018)                 | CA      | 304      | .00                  | 44.15       | NA           | M   | MA                   | NC                 | C               | R             | S              | EA               | .91         | G          | .96         | 0.45     | 0.12      |
|                                    |         |          |                      |             |              |     |                      |                    |                 |               |                | PA               | .91         | G          | .96         | 0.52     | 0.12      |
|                                    |         |          |                      |             |              |     |                      |                    |                 |               |                | SA               | .91         | G          | .96         | 0.20     | 0.12      |
| Holmberg &<br>Hellberg (2010)      | SE      | 1,428    | 1.00                 | 15.63       | 13-18        | M   | NA                   | NC                 | C               | R             | S              | SA               | NA          | G          | NA          | 0.38     | 0.02      |
| Howe & Parke<br>(2001)             | US      | 78       | .42                  | 8.70        | 4.3-<br>11.6 | L   | M                    | NC                 | C               | R             | S              | EA, PA,<br>SA, N | NA          | S          | .90         | 1.22     | 0.25      |
| Jacob et al. (2020)                | UK      | 7,403    | .51                  | 46.30       | 16+          | NA  | MA                   | NC                 | C               | R             | S              | SA, PA           | NA          | S          | NA          | 0.52     | 0.00      |
| Kamiya et al. (2016)               | IE      | 6,904    | .54                  | 63.95       | 50+          | M   | NA                   | NC                 | C               | R             | S              | SA               | .79         | G          | NA          | 1.68     | 0.05      |
| Khan et al. (2020)                 | BD      | 2,989    | .35                  | NA          | 11-18        | NA  | NA                   | NC                 | C               | R             | S              | PA               | NA          | G          | NA          | 0.42     | 0.01      |
| Kircaburun et al.<br>(2019)        | TR      | 252      | .07                  | 18.87       | 13-38        | NA  | NA                   | NC                 | C               | R             | S              | EA, EN           | .87         | G          | .68         | 1.03     | 0.16      |



| Article                    | Country | <i>N</i> | Proportion<br>female | Age<br>mean | Age<br>range | SES | Ethnic<br>background | Clinical<br>status | Study<br>design | CM<br>measure | CM<br>reporter | CM<br>type | CM<br>alpha | LO<br>type | LO<br>alpha | <i>g</i> | <i>SE</i> |
|----------------------------|---------|----------|----------------------|-------------|--------------|-----|----------------------|--------------------|-----------------|---------------|----------------|------------|-------------|------------|-------------|----------|-----------|
| Kivelä et al. (2019)       | NL      | 2,130    | .67                  | 42.40       | 18-65        | NA  | MA                   | M                  | L               | R             | S              | EA         | NA          | G          | NA          | 0.33     | 0.14      |
|                            |         |          |                      |             |              |     |                      |                    |                 |               |                | PA         | NA          | G          | NA          | 0.40     | 0.14      |
|                            |         |          |                      |             |              |     |                      |                    |                 |               |                | SA         | NA          | G          | NA          | 0.30     | 0.13      |
|                            |         |          |                      |             |              |     |                      |                    |                 |               |                | EN         | NA          | G          | NA          | 0.54     | 0.14      |
| Leve et al. (2007)         | US      | 121      | .49                  | 5.90        | NA           | NA  | MA                   | NC                 | C               | P             | R              | EA, PA,    | NA          | S          | .51         | 0.05     | 0.20      |
|                            |         |          |                      |             |              |     |                      |                    |                 |               |                | SA, N      |             |            |             |          |           |
|                            |         |          |                      |             |              |     |                      |                    |                 |               |                | EA, PA,    | NA          | S          | NA          | 0.38     | 0.19      |
|                            |         |          |                      |             |              |     |                      |                    |                 |               |                | SA, N      |             |            |             |          |           |
| Lin et al. (2020)          | TW      | 2,289    | .52                  | 31.32       | 30-35        | MH  | NA                   | NC                 | L               | R             | S              | EN         | NA          | E          | .51         | 0.07     | 0.05      |
|                            |         |          |                      |             |              |     |                      |                    |                 |               |                | EN         | NA          | S          | .77         | 0.23     | 0.05      |
|                            |         |          |                      |             |              |     |                      |                    |                 |               |                | EA         | NA          | E          | .51         | 0.22     | 0.08      |
|                            |         |          |                      |             |              |     |                      |                    |                 |               |                | EA         | NA          | S          | .77         | 0.18     | 0.08      |
|                            |         |          |                      |             |              |     |                      |                    |                 |               |                | PA         | NA          | E          | .51         | 0.11     | 0.06      |
| Lin et al. (2016)          | CN      | 256      | .28                  | 9.56        | NA           | M   | NA                   | C                  | C               | R             | P              | EN         | .81         | S          | .91         | 0.61     | 0.14      |
|                            |         |          |                      |             |              |     |                      |                    |                 |               |                | EA         | .84         | S          | .91         | 0.86     | 0.15      |
|                            |         |          |                      |             |              |     |                      |                    |                 |               |                | PA         | .92         | S          | .91         | 0.68     | 0.14      |
|                            |         |          |                      |             |              |     |                      |                    |                 |               |                | EA         | .84         | S          | .91         | 0.86     | 0.15      |
|                            |         |          |                      |             |              |     |                      |                    |                 |               |                | PA         | .92         | S          | .91         | 0.68     | 0.14      |
| Loos & Alexander<br>(1997) | US      | 402      | .61                  | 19.26       | 16-56        | MH  | M                    | NC                 | C               | R             | S              | PA         | NA          | G          | .94         | 0.50     | 0.11      |
|                            |         |          |                      |             |              |     |                      |                    |                 |               |                | EN         | NA          | G          | .94         | 0.88     | 0.12      |
| Løyland (2016)             | NO      | 369      | .41                  | 33.87       | 18-60        | L   | MA                   | NC                 | C               | R             | S              | SA         | NA          | G          | NA          | 0.33     | 0.15      |
|                            |         |          |                      |             |              |     |                      |                    |                 |               |                | EA, PA     | NA          | G          | NA          | 0.47     | 0.13      |
| Luo et al. (2020)          | CN      | 1,302    | .50                  | 11.31       | 9-13         | NA  | NA                   | NC                 | C               | R             | S              | EA         | .84         | S          | .88         | 0.58     | 0.06      |
| Ma et al. (2020)           | CN      | 981      | .49                  | 13.68       | NA           | NA  | NA                   | NC                 | C               | R             | S              | EA, PA,    | .79         | S          | .75         | 1.22     | 0.09      |
|                            |         |          |                      |             |              |     |                      |                    |                 |               |                | SA, N      |             |            |             |          |           |
| Malta et al. (2019)        | BR      | 102,301  | .51                  | NA          | NA           | NA  | NA                   | NC                 | C               | R             | S              | PA         | NA          | G          | NA          | 4.11     | 0.01      |
| Malta et al. (2014)        | BR      | 109,104  | .52                  | NA          | NA           | NA  | NA                   | NC                 | C               | R             | S              | PA         | NA          | G          | NA          | 0.46     | 0.00      |

| Article                            | Country    | <i>N</i> | Proportion<br>female | Age<br>mean | Age<br>range | SES | Ethnic<br>background | Clinical<br>status | Study<br>design | CM<br>measure | CM<br>reporter | CM<br>type                                               | CM<br>alpha                     | LO<br>type            | LO<br>alpha                     | <i>g</i>                             | <i>SE</i>                            |
|------------------------------------|------------|----------|----------------------|-------------|--------------|-----|----------------------|--------------------|-----------------|---------------|----------------|----------------------------------------------------------|---------------------------------|-----------------------|---------------------------------|--------------------------------------|--------------------------------------|
| Mangueira & Lopes<br>(2016)        | BR         | 110      | .05                  | 43.98       | 19-65        | L   | NA                   | M                  | C               | R             | S              | SA<br>PA                                                 | NA<br>NA                        | G<br>G                | NA<br>NA                        | -0.51<br>-0.42                       | 0.35<br>0.09                         |
| Matthews et al.<br>(2020)          | UK         | 2,232    | .51                  | 12.00       | NA           | M   | MA                   | NC                 | L               | P             | NA             | PN<br>PA<br>SA                                           | NA<br>NA<br>NA                  | S<br>S<br>S           | NA<br>NA<br>NA                  | 0.28<br>0.18<br>0.19                 | 0.07<br>0.05<br>0.18                 |
| Patanwala et al.<br>(2018)         | US         | 283      | .24                  | 59.00       | 50+          | L   | MI                   | NC                 | L               | R             | S              | PA<br>EA<br>SA                                           | NA<br>NA<br>NA                  | NA<br>NA<br>NA        | NA<br>NA<br>NA                  | 0.12<br>0.25<br>0.21                 | 0.13<br>0.12<br>0.18                 |
| Rafi et al. (2017)                 | IR         | 492      | .63                  | 13.60       | NA           | NA  | NA                   | NC                 | C               | R             | S              | EA                                                       | .96                             | NA                    | .66                             | 1.32                                 | 0.13                                 |
| Rew (2002)                         | US         | 96       | .47                  | 17.80       | 12-23        | NA  | M                    | NC                 | C               | R             | S              | SA                                                       | NA                              | G                     | .86                             | 0.45                                 | 0.22                                 |
| Rogers et al. (2007)               | UK         | 253      | .39                  | 38.40       | 17-82        | NA  | MA                   | NC                 | C               | R             | S              | EA, PA,<br>SA, N<br>EA, PA,<br>SA, N<br>EA, PA,<br>SA, N | .95                             | S<br>E<br>E           | .91<br>.89<br>.89               | 0.72<br>1.06<br>0.63                 | 0.14<br>0.16<br>0.14                 |
| Schaan et al. (2019)               | LU /<br>DE | 121      | 1.00                 | 23.00       | NA           | NA  | NA                   | NC                 | C               | R             | S              | EA<br>PA<br>SA<br>EN<br>PN                               | .89<br>.63<br>.92<br>.86<br>.30 | G<br>G<br>G<br>G<br>G | .88<br>.88<br>.88<br>.88<br>.88 | 0.53<br>0.64<br>0.39<br>0.92<br>0.87 | 0.20<br>0.25<br>0.30<br>0.24<br>0.19 |
| Scheer & Antebi-<br>Gruszka (2019) | US         | 207      | .13                  | 27.60       | 18-78        | M   | M                    | NC                 | C               | R             | S              | PA                                                       | NA                              | G                     | .76                             | 0.31                                 | 0.12                                 |
| Schuck & Widom<br>(2001)           | US         | 582      | 1.00                 | 29.11       | 18-40        | M   | M                    | NC                 | L               | P             | R              | PA, SA,<br>N                                             | NA                              | S                     | NA                              | 0.10                                 | 0.08                                 |

| Article                                                            | Country | <i>N</i> | Proportion<br>female | Age<br>mean | Age<br>range | SES | Ethnic<br>background | Clinical<br>status | Study<br>design | CM<br>measure | CM<br>reporter | CM<br>type       | CM<br>alpha | LO<br>type | LO<br>alpha | <i>g</i> | <i>SE</i> |
|--------------------------------------------------------------------|---------|----------|----------------------|-------------|--------------|-----|----------------------|--------------------|-----------------|---------------|----------------|------------------|-------------|------------|-------------|----------|-----------|
| Steenkamp et al. (2019)                                            | NL      | 59       | .42                  | 31.80       | 19-57        | NA  | NA                   | C                  | C               | R             | S              | PA               | NA          | G          | NA          | 0.90     | 0.30      |
|                                                                    |         |          |                      |             |              |     |                      |                    |                 |               |                | SA               | NA          | G          | NA          | 0.15     | 0.38      |
|                                                                    |         |          |                      |             |              |     |                      |                    |                 |               |                | EA               | NA          | G          | NA          | 0.17     | 0.28      |
| Stensland et al. (2014)<br>(Data available from<br>the HUNT study) | NO      | 10,464   | .50                  | 15.80       | 12-20        | MH  | MA                   | NC                 | C               | R             | S              | SA               | NA          | G          | NA          | 0.73     | 0.06      |
|                                                                    |         |          |                      |             |              |     |                      |                    |                 |               |                | SA               | NA          | G          | NA          | 0.80     | 0.07      |
|                                                                    |         |          |                      |             |              |     |                      |                    |                 |               |                | PA               | NA          | G          | NA          | 0.55     | 0.04      |
| Stults et a. (2015)                                                | US      | 528      | .00                  | NA          | 18-19        | M   | M                    | NC                 | C               | R             | S              | EA, PA,<br>SA, N | NA          | G          | .67         | 0.41     | 0.09      |
| Tang et al. (2018)                                                 | CN      | 15,623   | .49                  | 15.10       | 12-18        | MH  | MA                   | NC                 | C               | R             | S              | M, N             | .81         | NA         | .76         | 0.26     | 0.02      |
|                                                                    |         |          |                      |             |              |     |                      |                    |                 |               |                | N                | .81         | NA         | .76         | 0.38     | 0.02      |
| Tidefors et al. (2011)                                             | SE      | 45       | .00                  | 16.20       | 13-22        | NA  | M                    | C                  | L               | P             | R              | EA, N            | NA          | E          | NA          | -0.10    | 0.34      |
|                                                                    |         |          |                      |             |              |     |                      |                    |                 |               |                | PA               | NA          | E          | NA          | 0.09     | 0.29      |
|                                                                    |         |          |                      |             |              |     |                      |                    |                 |               |                | SA               | NA          | E          | NA          | -0.34    | 0.30      |
| Træen et al. (2020) -<br>Study 1                                   | NO      | 1,271    | .48                  | 66.80       | 60-75        | NA  | NA                   | NC                 | C               | R             | S              | SA               | NA          | S          | .80         | 0.28     | 0.10      |
| Træen et al. (2020) -<br>Study 2                                   | DK      | 1,045    | .48                  | 67.80       | 60-75        | NA  | NA                   | NC                 | C               | R             | S              | SA               | NA          | S          | .80         | 0.39     | 0.12      |
| Træen et al. (2020) -<br>Study 3                                   | BE      | 991      | .48                  | 66.85       | 60-75        | NA  | NA                   | NC                 | C               | R             | S              | SA               | NA          | S          | .80         | 0.83     | 0.13      |
| Træen et al. (2020) -<br>Study 4                                   | PT      | 509      | .47                  | 66.71       | 60-75        | NA  | NA                   | NC                 | C               | R             | S              | SA               | NA          | S          | .80         | 0.06     | 0.27      |
| Van der Veen et al. (2015)                                         | NL      | 350      | .66                  | 70.70       | 60+          | NA  | NA                   | C                  | C               | R             | S              | EN               | NA          | G          | NA          | 0.25     | 0.11      |
|                                                                    |         |          |                      |             |              |     |                      |                    |                 |               |                | PA               | NA          | G          | NA          | 0.10     | 0.14      |
|                                                                    |         |          |                      |             |              |     |                      |                    |                 |               |                | EA               | NA          | G          | NA          | 0.15     | 0.12      |
|                                                                    |         |          |                      |             |              |     |                      |                    |                 |               |                | SA               | NA          | G          | NA          | 0.12     | 0.13      |

| Article             | Country | <i>N</i> | Proportion<br>female | Age<br>mean | Age<br>range | SES | Ethnic<br>background | Clinical<br>status | Study<br>design | CM<br>measure | CM<br>reporter | CM<br>type | CM<br>alpha | LO<br>type | LO<br>alpha | <i>g</i> | <i>SE</i> |
|---------------------|---------|----------|----------------------|-------------|--------------|-----|----------------------|--------------------|-----------------|---------------|----------------|------------|-------------|------------|-------------|----------|-----------|
| Wong et al. (2019)  | US      | 308      | .46                  | 35.49       | 18-70        | M   | MA                   | NC                 | C               | R             | S              | EN         | NA          | G          | .92         | 0.82     | 0.13      |
|                     |         |          |                      |             |              |     |                      |                    |                 |               |                | PN         | NA          | G          | .92         | 0.70     | 0.20      |
|                     |         |          |                      |             |              |     |                      |                    |                 |               |                | EA         | NA          | G          | .92         | 0.88     | 0.13      |
|                     |         |          |                      |             |              |     |                      |                    |                 |               |                | PA         | NA          | G          | .92         | 0.42     | 0.14      |
|                     |         |          |                      |             |              |     |                      |                    |                 |               |                | SA         | NA          | G          | .92         | 0.38     | 0.18      |
| Zhang et al. (2020) | CN      | 1,019    | .47                  | 18.60       | 18-21        | M   | NA                   | NC                 | C               | R             | S              | EN         | NA          | G          | .84         | 0.39     | 0.12      |
|                     |         |          |                      |             |              |     |                      |                    |                 |               |                | PN         | NA          | G          | .84         | -0.19    | 0.16      |
|                     |         |          |                      |             |              |     |                      |                    |                 |               |                | EA         | NA          | G          | .84         | 0.73     | 0.14      |
|                     |         |          |                      |             |              |     |                      |                    |                 |               |                | PA         | NA          | G          | .84         | 0.46     | 0.07      |
|                     |         |          |                      |             |              |     |                      |                    |                 |               |                | SA         | NA          | G          | .84         | 0.37     | 0.10      |

*Note.* CM = child maltreatment. LO = loneliness. NA = not available. SES (socioeconomic status): L = >75% low; M = mixed; MH = >75%

middle/high. Ethnic background: M = mixed; MA = >75% majority; MI = >75% minority. Clinical status: C = clinical; M = mixed; NC = nonclinical.

Study design: C = cross-sectional; L = longitudinal. Child maltreatment measure: P = prospective; R = retrospective. Child maltreatment reporter: P = parental report; R = records; S = self-report. Child maltreatment type: EA = emotional abuse; EN = emotional neglect; M = maltreatment (not further specified); N = neglect (not further specified); PA = physical abuse; PN = physical neglect; SA = sexual abuse. Loneliness type: E = emotional; G = general; S = social.
